# Supplementary material
Source: publisher figshare collection journal article supplement (https://tandf.figshare.com/articles/dataset/_/12848309)
Supplement: Supplementary file 1 [file 1]

**Figure One.** Graduate and undergraduate student enrollment in WebGIS over time. The left axis and bar graphs represent raw numbers of students while the right axis and line represents the undergrad/grad student ratio.


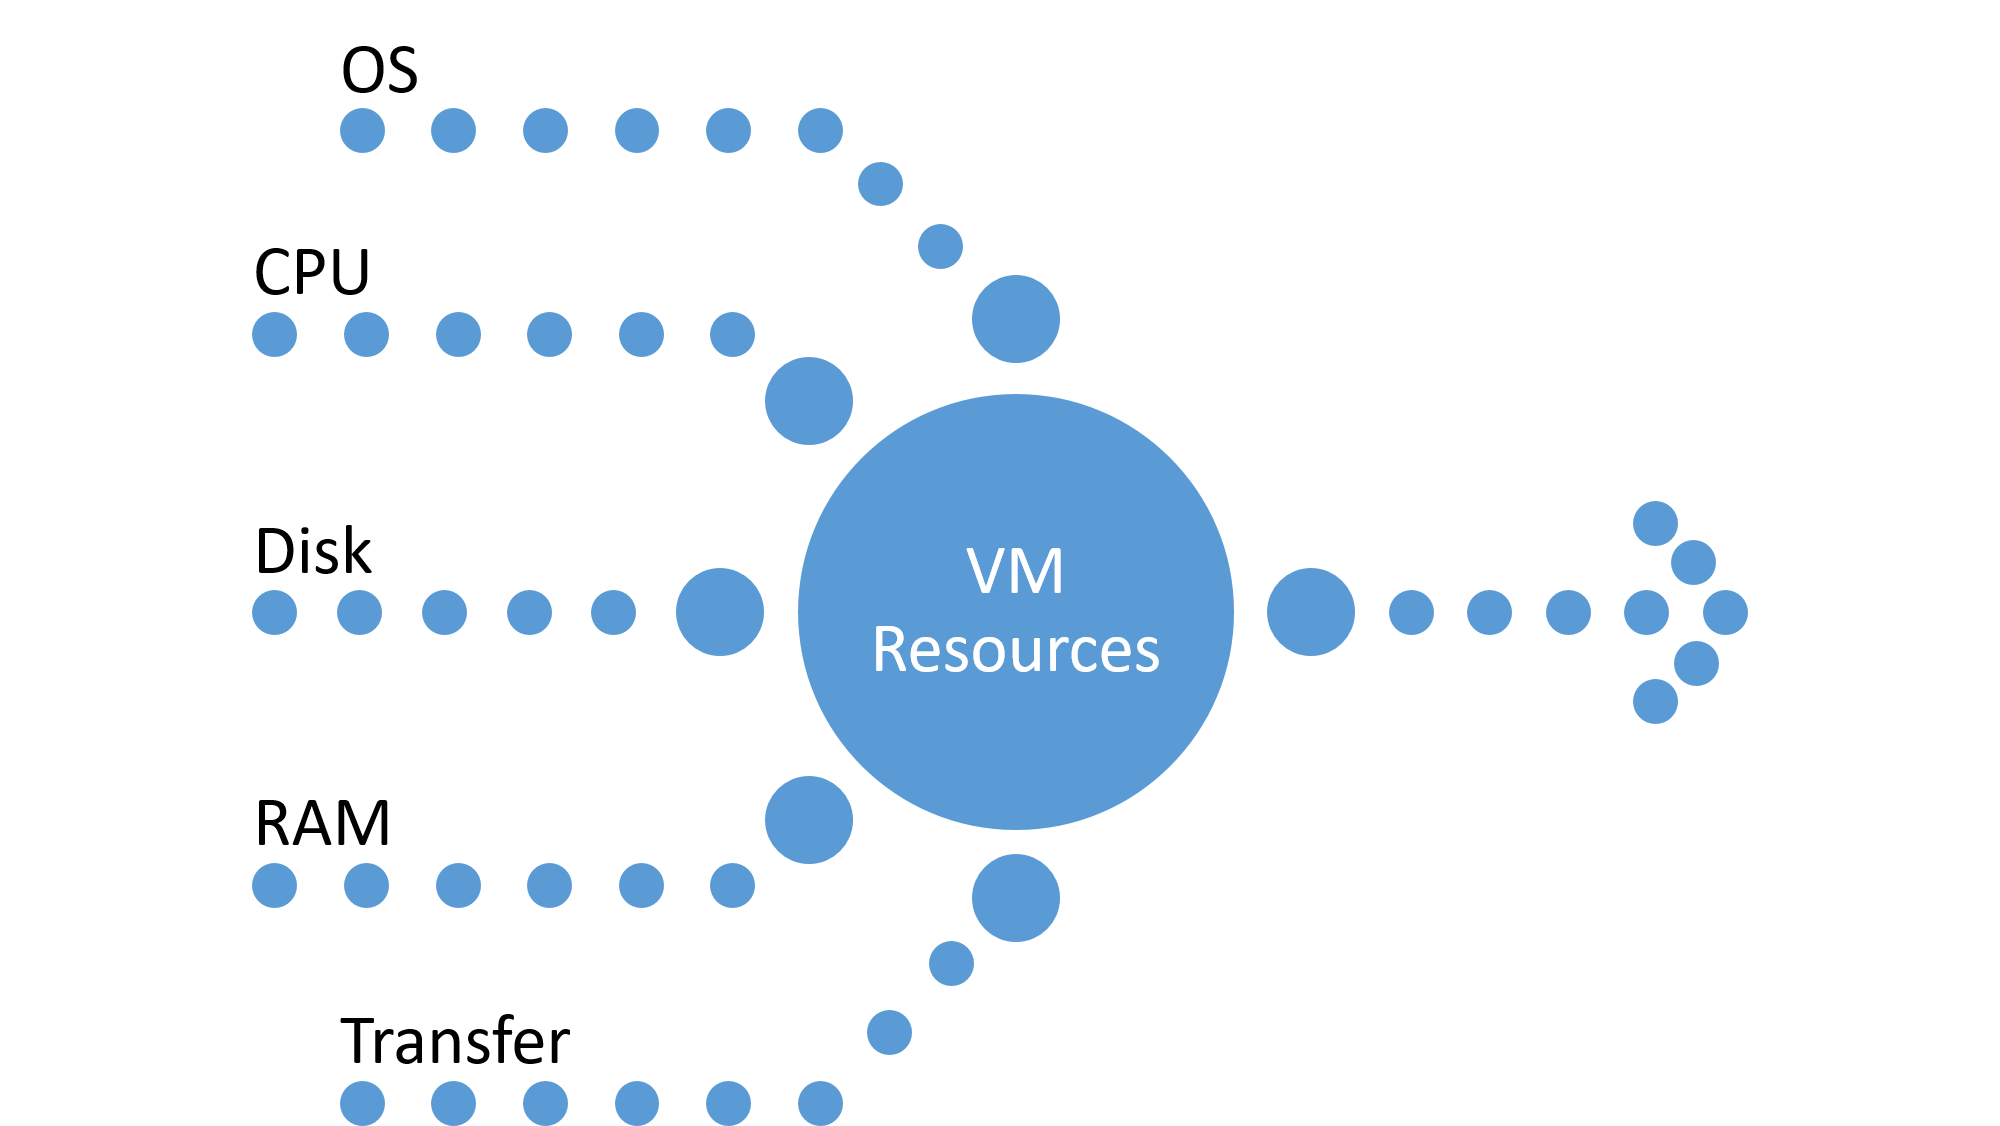


**Figure Two.** Resources necessary for work using VMs in this course context.


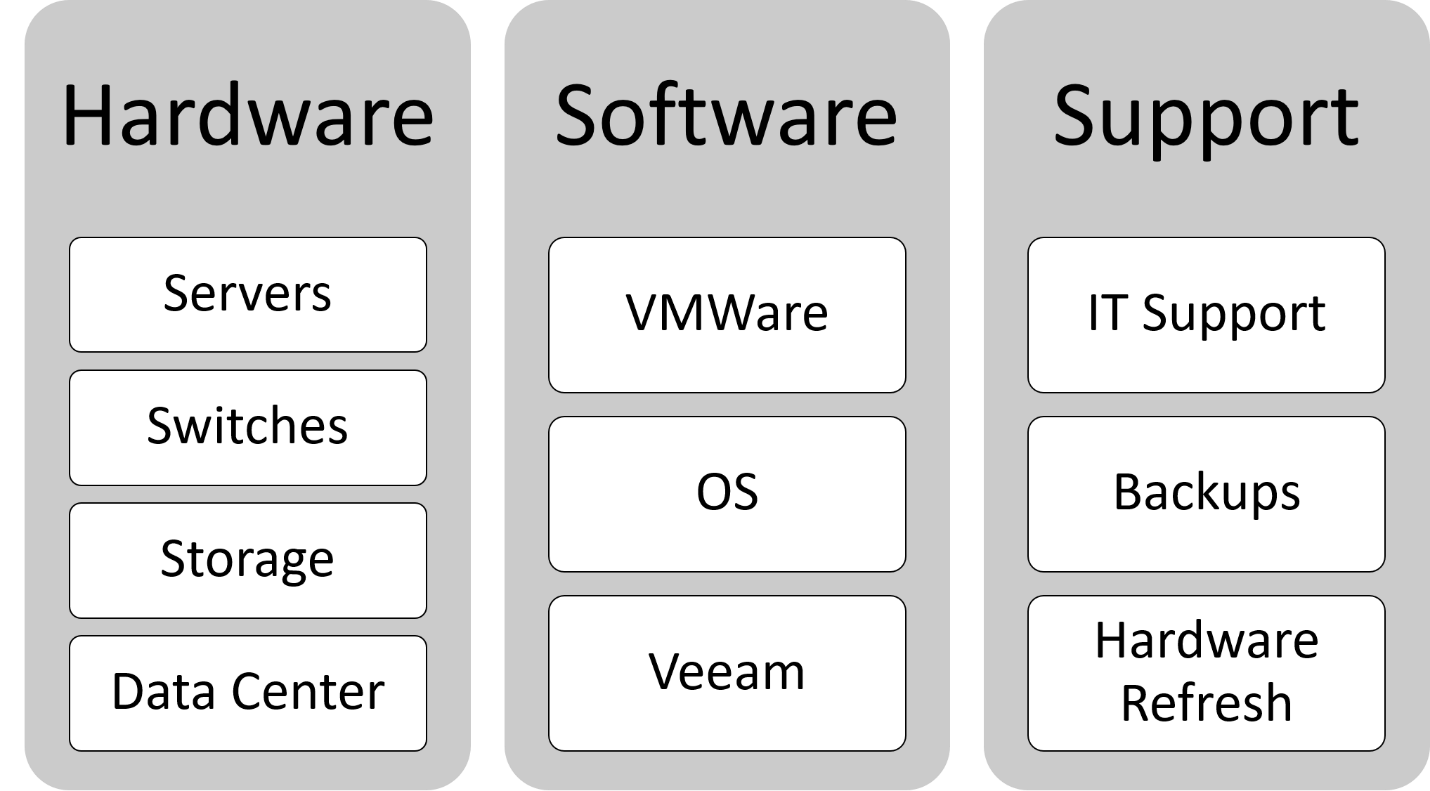


**Figure Three.** Necessary components of on-premise VM installation.
