# Supplementary material
Source: publisher figshare collection journal article supplement (https://tandf.figshare.com/articles/dataset/_/12848309)
Supplement: Supplementary file 1 [file 1]

| Syllabus |                                                                     |                          |                                                               |                                                                             |                                                                                  |                                                      |             |                    |
|----------|---------------------------------------------------------------------|--------------------------|---------------------------------------------------------------|-----------------------------------------------------------------------------|----------------------------------------------------------------------------------|------------------------------------------------------|-------------|--------------------|
| Week     | Readings                                                            | Topic                    | Monday                                                        | Wednesday                                                                   | Friday                                                                           | Lab                                                  | HW          | Project            |
| 13-Jan   | <a href="#">Why use Slack? &amp; Pro Git ch 1, 2, 3.1, 3.2, 4.3</a> | Intro and setup          | <a href="#">Intro to class</a>                                | <a href="#">Git 1 &amp; 2 &amp; 3</a><br><a href="#">Q's</a>                | <a href="#">Intro to the Internet</a><br><a href="#">Q's</a>                     | No Lab                                               | Homework 1  |                    |
| 20-Jan   | TBA                                                                 | Online Mapping           | MLK Day (No Class)                                            | <a href="#">Online Mapping</a><br><a href="#">Q's</a>                       | <a href="#">ArcGIS Online</a><br><a href="#">Q's</a>                             | <a href="#">GitHub setup</a>                         | Homework 2  | Project Pitches    |
| 27-Jan   |                                                                     | Esri Web Apps            | <a href="#">Data Types and Sources</a><br><a href="#">Q's</a> | TBD<br><a href="#">Q's</a>                                                  | <a href="#">Web App Builder / ArcGIS Collector</a><br><a href="#">Q's</a><br>CSS | <a href="#">ArcGIS Online</a>                        | Homework 3  |                    |
| 3-Feb    | <a href="#">Material Design</a>                                     | Intro to HTML / CSS      | <a href="#">Intro Web Coding</a><br><a href="#">Q's</a>       | <a href="#">CSS</a><br><a href="#">Q's</a>                                  | Cont. & Usability/Accessibility<br><a href="#">Q's</a>                           | <a href="#">Resume</a>                               | Homework 4  |                    |
| 11-Feb   | <a href="#">w3schools JS</a>                                        | Javascript               | <a href="#">Javascript Basics</a><br><a href="#">Q's</a>      | <a href="#">Javascript Cont.</a><br><a href="#">Q's</a>                     | TBD<br><a href="#">Q's</a>                                                       | TBD                                                  | Homework 5  |                    |
| 17-Feb   | TBA                                                                 | Javascript, Maps, & Data | <a href="#">Javascript Cont.</a><br><a href="#">Q's</a>       | Simple Mapping API - Leaflet & JSON & REST calls<br><a href="#">Q's</a>     | <a href="#">ArcGIS JS</a><br><a href="#">Q's</a>                                 | <a href="#">Basic Leaflet Javascript Mapping</a>     | Homework 6  | **Status Report ** |
| 24-Feb   | TBA                                                                 | Mapping APIs             | <a href="#">Advanced ArcGIS JS</a><br><a href="#">Q's</a>     | <a href="#">3D Web Mapping</a><br><a href="#">Q's</a>                       | <a href="#">Operations Dashboard for ArcGIS</a><br><a href="#">Q's</a>           | <a href="#">Advanced Leaflet Javascript Mapping</a>  | Homework 7  |                    |
| 2-Mar    |                                                                     | Mid Term Week            | Review                                                        | Mid Term                                                                    | Exam Answers                                                                     | <a href="#">StoryMapping with Data Visualization</a> | Homework 8  |                    |
| 9-Mar    | Spring                                                              | Break                    | -                                                             | No                                                                          | Class                                                                            | yay!!!                                               |             |                    |
| 16-Mar   | TBA                                                                 | Web Backends             | <a href="#">Web Servers cont.</a><br><a href="#">Q's</a>      | Project Discussion                                                          | Project Discussion                                                               | <a href="#">Interactive Charts</a>                   | Homework 9  |                    |
| 23-Mar   | TBA                                                                 | ArcGIS Enterprise        | TBD<br><a href="#">Q's</a>                                    | <a href="#">ArcEnterprise</a><br><a href="#">Q's</a>                        | <a href="#">ArcEnterprise Cont.</a><br><a href="#">Q's</a>                       | <a href="#">TBD</a>                                  | Homework 10 |                    |
| 30-Mar   | TBA                                                                 | Visualizations           | D3 & HighCharts.js<br><a href="#">Q's</a>                     | <a href="#">StoryMapping with Data Visualization</a><br><a href="#">Q's</a> | <a href="#">Web Servers</a><br><a href="#">Q's</a>                               | <a href="#">FeatureLayer Web Editing</a>             |             |                    |
| 6-Apr    | TBA                                                                 | ArcGIS Portal            | <a href="#">ArcGIS Portal</a><br><a href="#">Q's</a>          | <a href="#">ArcGIS Portal Cont.</a><br><a href="#">Q's</a>                  | <a href="#">ArcGIS Portal Cont.</a><br><a href="#">Q's</a>                       | No Lab                                               | Homework 11 |                    |
| 13-Apr   | TBA                                                                 | Advanced WebGIS          | <a href="#">Vector Tiles</a><br><a href="#">Q's</a>           | <a href="#">Vector Tiles/Javascript</a><br><a href="#">Q's</a>              | Reading Day(no class)                                                            | Submit all your project documents by April 21 11pm   | Homework 12 |                    |
| 20-Apr   | TBA                                                                 | Project                  | <a href="#">ArcGIS Insights</a><br><a href="#">Q's</a>        | Exam Review                                                                 | Presentations                                                                    |                                                      | Homework 13 |                    |
| 27-Apr   | TBA                                                                 | Presentations            | Presentation on Monday and Tuesday                            | Reading Day                                                                 | Final Exam<br>2020-05-04 7am- 2020-05-04 11pm                                    | No Lab                                               |             |                    |
